# Supplementary material
Source: Springer Nature journal article supplement (https://www.springermedizin.de/resource/supplementary/13024_2011_329_MOESM10_ESM.pdf/9643764)

**A****MoRK13-inf**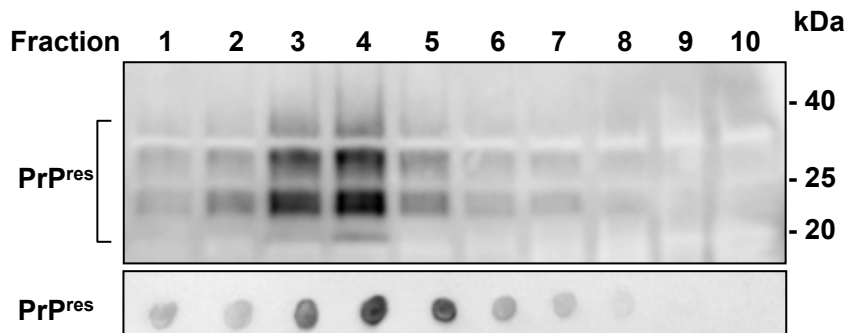**B**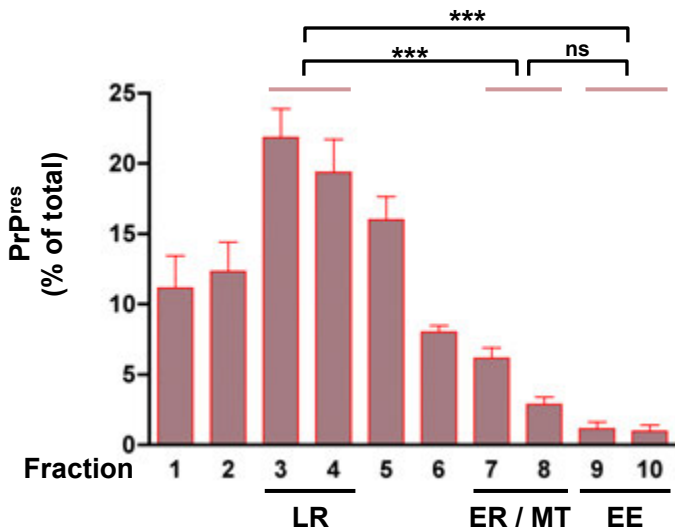

Supplement: MOESM10 [file 9643764]
